# Supplementary material for: Novel Product for the Management of Coronary Ruptures Happening during Percutaneous Coronary Interventions
Source: Case Rep Cardiol. 2021 Feb 11;2021:6688338. doi: 10.1155/2021/6688338 (PMC7892221; doi:10.1155/2021/6688338)
Supplement: Supplementary Materials — Video 1: coronary angiography showing significant stenosis in LAD artery and diagonal branch. Video 2: stent placed in LAD and side branch flow compromised. Video 3: rewiring of the diagonal branch. Video 4: when tip of the wire is causing rupture of the diagonal branch. Video 5: leakage in the diagonal branch. Video 6: using balloon inflation to seal the rupture. Video 7: rupture under control after prolonged balloon inflation. Video 8: pigtail insertion after 4 hours due to tamponade and angiography showing diagonal leakage. Video 9: using balloon inflation for sealing the diagonal branch. Video 10: injecting Spongostan using microcatheter. Video 11: sealed diagonal branch. Video 12: coronary angiography after 48 hours showing restored diagonal flow without leakage. [file 6688338.f1.zip]

Archive with 12 entries (12 files):
- 12.mp4
- 1.mp4
- 2.mp4
- 3.mp4
- 4.mp4
- 5.mp4
- 6.mp4
- 7.mp4
- 8.mp4
- 9.mp4
- 10.mp4
- 11.mp4
